# Supplementary material
Source: publisher site journal article supplement (https://www.dovepress.com/article/275983)
Supplement: Supplementary file 1 [file get_supplementary_file.php]

## Supplementary materials

Table S1 – Less common symptoms at presentation sorted by admission status (COVID-positive patients)

| Characteristics<br>(in %) | All patients<br>(n=352) | No inpatient admission<br>(n=280) | General ward<br>(n=13) | Intermediate Care/<br>Intensive Care Unit (n=59) |
|---------------------------|-------------------------|-----------------------------------|------------------------|--------------------------------------------------|
| Diarrhea                  | 5.6                     | 4.9                               | 0                      | 10.2                                             |
| Shivering                 | 5.6                     | 5.3                               | 0                      | 8.5                                              |
| Taste changes             | 3.5                     | 3.8                               | 0                      | 1.7                                              |
| Changes in smell          | 2.1                     | 2.3                               | 0                      | 1.7                                              |
| Nausea                    | 3.5                     | 1.9                               | 23.1                   | 6.8                                              |
| Epigastric pain           | 1.2                     | 1.9                               | 7.7                    | 1.7                                              |
| Fainting                  | 0.9                     | 0                                 | 0                      | 5.1                                              |
| Chest pain                | 0.6                     | 0                                 | 7.7                    | 3.4                                              |

**Table S2 – Main symptoms (detailed overview and comparison)**

|                                     | in %      | p-value |
|-------------------------------------|-----------|---------|
| <b>discharge vs. ward admission</b> |           |         |
| Cough                               | 57 vs. 62 | 0.38    |
| Fever                               | 34 vs. 77 | <0.001  |
| Sore throat                         | 39 vs. 8  | <0.001  |
| Headache                            | 30 vs. 15 | 0.13    |
| Body aches                          | 23 vs. 15 | 0.27    |
| Exhaustion                          | 15 vs. 31 | <0.001  |
| Rhinitis                            | 20 vs. 8  | 0.14    |
| Dyspnea                             | 5 vs. 23  | <0.001  |
| <b>discharge vs. IMC/ICU</b>        |           |         |
| Cough                               | 57 vs. 73 | 0.01    |
| Fever                               | 34 vs. 78 | <0.001  |
| Sore throat                         | 39 vs. 15 | <0.001  |
| Headache                            | 30 vs. 15 | 0.01    |
| Body aches                          | 23 vs. 19 | 0.26    |
| Exhaustion                          | 15 vs. 37 | <0.001  |
| Rhinitis                            | 20 vs. 2  | <0.001  |
| Dyspnea                             | 5 vs. 48  | <0.001  |
| <b>ward admission vs. IMC/ICU</b>   |           |         |
| Cough                               | 62 vs. 73 | 0.21    |
| Fever                               | 77 vs. 78 | 0.47    |
| Sore throat                         | 8 vs. 15  | 0.24    |
| Headache                            | 15 vs. 15 | 0.50    |
| Body aches                          | 15 vs. 19 | 0.39    |
| Exhaustion                          | 31 vs. 37 | 0.33    |
| Rhinitis                            | 8 vs. 2   | 0.12    |
| Dyspnea                             | 23 vs. 48 | 0.09    |
| <b>IMC/ICU vs. all positive</b>     |           |         |
| Cough                               | 73 vs. 60 | 0.03    |
| Fever                               | 78 vs. 43 | <0.001  |
| Sore throat                         | 15 vs. 33 | <0.001  |
| Headache                            | 15 vs. 27 | 0.03    |
| Body aches                          | 19 vs. 22 | 0.29    |
| Exhaustion                          | 37 vs. 19 | <0.001  |
| Rhinitis                            | 2 vs. 16  | <0.001  |
| Dyspnea                             | 48 vs. 13 | <0.001  |
| <b>deceased vs. IMC/ICU</b>         |           |         |
| Cough                               | 73 vs. 73 | 0.27    |
| Fever                               | 82 vs. 78 | 0.35    |
| Sore throat                         | 9 vs. 15  | 0.30    |
| Headache                            | 0 vs. 15  | 0.09    |
| Body aches                          | 0 vs. 19  | 0.06    |
| Exhaustion                          | 36 vs. 37 | 0.48    |
| Rhinitis                            | 0 vs. 2   | 0.33    |
| Dyspnea                             | 91 vs. 48 | 0.004   |

IMC/ICU = Intermediate care/Intensive care unit

**Table S3 – Less common symptoms (detailed overview and comparison)**

|                                     | <b>in %</b>  | <b>p-value</b> |
|-------------------------------------|--------------|----------------|
| <b>discharge vs. ward admission</b> |              |                |
| Diarrhea                            | 4.9 vs. 0    | 0.24           |
| Shivering                           | 5.3 vs. 0    | 0.23           |
| Taste changes                       | 3.8 vs. 0    | 0.24           |
| Changes in smelling                 | 2.3 vs. 0    | 0.26           |
| Nausea                              | 1.9 vs. 23.1 | 0.11           |
| Epigastric pain                     | 1.9 vs. 7.7  | 0.21           |
| Fainting                            | 0 vs. 0      | -              |
| Chest pain                          | 0 vs. 7.7    | 0.22           |
| <b>discharge vs. IMC/ICU</b>        |              |                |
| Diarrhea                            | 4.9 vs. 10.2 | 0.34           |
| Shivering                           | 5.3 vs. 8.5  | 0.39           |
| Taste changes                       | 3.8 vs. 1.7  | 0.33           |
| Changes in smelling                 | 2.3 vs. 1.7  | 0.43           |
| Nausea                              | 1.9 vs. 6.8  | 0.28           |
| Epigastric pain                     | 1.9 vs. 1.7  | 0.47           |
| Fainting                            | 0 vs. 5.1    | 0.23           |
| Chest pain                          | 0 vs. 3.4    | 0.24           |
| <b>ward admission vs. IMC/ICU</b>   |              |                |
| Diarrhea                            | 0 vs. 10.2   | 0.20           |
| Shivering                           | 0 vs. 8.5    | 0.22           |
| Taste changes                       | 0 vs. 1.7    | 0.29           |
| Changes in smelling                 | 0 vs. 1.7    | 0.29           |
| Nausea                              | 23.1 vs. 6.8 | 0.25           |
| Epigastric pain                     | 7.7 vs. 1.7  | 0.26           |
| Fainting                            | 0 vs. 5.1    | 0.21           |
| Chest pain                          | 7.7 vs. 3.4  | 0.33           |
| <b>IMC/ICU vs. all positive</b>     |              |                |
| Diarrhea                            | 10.2 vs. 5.6 | 0.37           |
| Shivering                           | 8.5 vs. 5.6  | 0.40           |
| Taste changes                       | 1.7 vs. 3.5  | 0.34           |
| Changes in smelling                 | 1.7 vs. 2.1  | 0.45           |
| Nausea                              | 6.8 vs. 3.5  | 0.35           |
| Epigastric pain                     | 1.7 vs. 1.2  | 0.42           |
| Fainting                            | 5.1 vs. 0.9  | 0.25           |
| Chest pain                          | 3.4 vs. 0.6  | 0.25           |
| <b>deceased vs. IMC/ICU</b>         |              |                |
| Diarrhea                            | 9.1 vs. 10.2 | 0.47           |
| Shivering                           | 0 vs. 8.5    | 0.22           |
| Taste changes                       | 0 vs. 1.7    | 0.27           |
| Changes in smelling                 | 0 vs. 1.7    | 0.27           |
| Nausea                              | 0 vs. 6.8    | 0.23           |
| Epigastric pain                     | 0 vs. 1.7    | 0.27           |
| Fainting                            | 0 vs. 5.1    | 0.23           |
| Chest pain                          | 0 vs. 3.4    | 0.24           |

IMC/ICU = Intermediate care/Intensive care unit

**Table S4 – Comorbidities (detailed overview and comparison)**

|                                     | in %          | p-value |
|-------------------------------------|---------------|---------|
| <b>discharge vs. ward admission</b> |               |         |
| Cardiovascular disease              | 7.1 vs. 23.1  | 0.19    |
| Lung disease                        | 3.9 vs. 0     | 0.24    |
| Cancer / immunosuppression          | 1.7 vs. 7.7   | 0.26    |
| Arterial hypertension               | 6.8 vs. 15.4  | 0.33    |
| Diabetes mellitus                   | 2.1 vs. 0     | 0.27    |
| Obesity                             | 0.7 vs. 0     | 0.42    |
| Metabolic disease                   | 6.1 vs. 15.4  | 0.32    |
| Gastroenterologic disease           | 4.6 vs. 15.4  | 0.29    |
| Orthopedic disease                  | 3.2 vs. 7.7   | 0.32    |
| Neurologic disease                  | 1.1 vs. 7.7   | 0.24    |
| Renal disease                       | 1.4 vs. 7.7   | 0.25    |
| Skin disorder                       | 1.8 vs. 0     | 0.28    |
| Ear/throat disease                  | 1.4 vs 0      | 0.30    |
| Gynecologic disease                 | 0.4 vs. 0     | 0.45    |
| Ophthalmologic disease              | 0.7 vs. 0     | 0.26    |
| Psychologic disorder                | 0.7 vs. 0     | 0.26    |
| <b>discharge vs. IMC/ICU</b>        |               |         |
| Cardiovascular disease              | 7.1 vs. 27.1  | 0.27    |
| Lung disease                        | 3.9 vs. 15.3  | 0.27    |
| Cancer / immunosuppression          | 1.7 vs. 11.9  | 0.24    |
| Arterial hypertension               | 6.8 vs. 27.1  | 0.26    |
| Diabetes mellitus                   | 2.1 vs. 10.2  | 0.26    |
| Obesity                             | 0.7 vs. 5.1   | 0.24    |
| Metabolic disease                   | 6.1 vs. 16.9  | 0.30    |
| Gastroenterologic disease           | 4.6 vs. 10.2  | 0.33    |
| Orthopedic disease                  | 3.2 vs. 6.8   | 0.34    |
| Neurologic disease                  | 1.1 vs. 5.1   | 0.26    |
| Renal disease                       | 1.4 vs. 6.8   | 0.25    |
| Skin disorder                       | 1.8 vs. 1.7   | 0.4     |
| Ear/throat disease                  | 1.4 vs. 0     | 0.49    |
| Gynecologic disease                 | 0.4 vs. 1.7   | 0.27    |
| Ophthalmologic disease              | 0.7 vs. 1.7   | 0.32    |
| Psychologic disorder                | 0.7 vs. 1.7   | 0.32    |
| <b>ward admission vs. IMC/ICU</b>   |               |         |
| Cardiovascular disease              | 23.1 vs. 27.1 | 0.46    |
| Lung disease                        | 0 vs. 15.3    | 0.22    |
| Cancer / immunosuppression          | 7.7 vs. 11.9  | 0.40    |
| Arterial hypertension               | 15.4 vs. 27.1 | 0.37    |
| Diabetes mellitus                   | 0 vs. 10.2    | 0.23    |
| Obesity                             | 0 vs. 5.1     | 0.25    |
| Metabolic disease                   | 15.4 vs. 16.9 | 0.48    |
| Gastroenterologic disease           | 15.4 vs. 10.2 | 0.40    |
| Orthopedic disease                  | 7.7 vs. 6.8   | 0.46    |
| Neurologic disease                  | 7.7 vs. 5.1   | 0.40    |
| Renal disease                       | 7.7 vs. 6.8   | 0.47    |

|                                 |               |             |
|---------------------------------|---------------|-------------|
| Skin disorder                   | 0 vs. 1.7     | 0.28        |
| Ear/throat disease              | 0 vs. 0       | -           |
| Gynecologic disease             | 0 vs. 1.7     | 0.28        |
| Ophthalmologic disease          | 0 vs. 1.7     | 0.28        |
| Psychologic disorder            | 0 vs. 1.7     | 0.28        |
| <b>IMC/ICU vs. all positive</b> |               |             |
| Cardiovascular disease          | 27.1 vs. 2.3  | 0.23        |
| Lung disease                    | 15.3 vs. 0.7  | 0.22        |
| Cancer / immunosuppression      | 11.9 vs. 2.1  | 0.35        |
| Arterial hypertension           | 27.1 vs. 3.9  | 0.24        |
| Diabetes mellitus               | 10.2 vs. 1.3  | 0.24        |
| Obesity                         | 5.1 vs. 0.5   | 0.23        |
| Metabolic disease               | 16.9 vs. 2.9  | 0.25        |
| Gastroenterologic disease       | 10.2 vs. 1.9  | 0.25        |
| Orthopedic disease              | 6.8 vs. 1.1   | 0.24        |
| Neurologic disease              | 5.1 vs. 0.8   | 0.25        |
| Renal disease                   | 6.8 vs. 0.7   | 0.23        |
| Skin disorder                   | 1.7 vs. 0.6   | 0.30        |
| Ear/throat disease              | 0 vs. 0.6     | 0.45        |
| Gynecologic disease             | 1.7 vs. 0.1   | 0.23        |
| Ophthalmologic disease          | 1.7 vs. 0.2   | 0.24        |
| Psychologic disorder            | 1.7 vs. 0.3   | 0.25        |
| <b>deceased vs. IMC/ICU</b>     |               |             |
| Cardiovascular disease          | 54.6 vs. 27.1 | <b>0.04</b> |
| Lung disease                    | 36.4 vs. 15.3 | 0.06        |
| Cancer / immunosuppression      | 18.2 vs. 11.9 | 0.39        |
| Arterial hypertension           | 27.3 vs. 27.1 | 0.50        |
| Diabetes mellitus               | 0 vs. 10.2    | 0.22        |
| Obesity                         | 0 vs. 5.1     | 0.23        |
| Metabolic disease               | 0 vs. 16.9    | 0.22        |
| Gastroenterologic disease       | 0 vs. 10.2    | 0.22        |
| Orthopedic disease              | 0 vs. 6.8     | 0.23        |
| Neurologic disease              | 0 vs. 5.1     | 0.23        |
| Renal disease                   | 9.1 vs. 6.8   | 0.43        |
| Skin disorder                   | 0 vs. 1.7     | 0.28        |
| Ear/throat disease              | 0 vs. 0       | -           |
| Gynecologic disease             | 0 vs. 1.7     | 0.28        |
| Ophthalmologic disease          | 0 vs. 1.7     | 0.28        |
| Psychologic disorder            | 0 vs. 1.7     | 0.28        |

---

IMC/ICU = Intermediate care/Intensive care unit

**Table S5 - Expanded baseline characteristics**

|                                         | <b>past medical condition</b><br>in %                                                                                         |
|-----------------------------------------|-------------------------------------------------------------------------------------------------------------------------------|
| All tested patients<br>(n=3015)         | CV 2.3, P 0.7, C/I 2.1, AH 3.9, DM 1.3, O 0.5, M 2.9, GE 1.9, OR 1.1, N 0.8,<br>R 0.7, S 0.6, ET 0.6, G 0.1, OPH 0.2, PSY 0.3 |
| All positive tested patients<br>(n=352) | CV 4.2, P 1.5, C/I 4.5, AH 6.8, DM 2.4, O 1.2, M 5.9, GE 4.1, OR 2.9, N 1.8,<br>R 1.5, S 1.5, ET 1.2, G 0.3, OPH 0.5, PSY 0.5 |
| No admission<br>(n=280)                 | CV 7.1, P 3.9, C/I 1.7, AH 6.8, DM 2.1, O 0.7, M 6.1, GE 4.6, OR 3.2, N 1.1,<br>R 1.4, S 1.8, ET 1.4, G 0.4, OPH 0.7, PSY 0.7 |
| General ward<br>(n=13)                  | CV 23.1, C/I 7.7, AH 15.4, M 15.4, GE 15.4, OR 7.7, N 7.7, R 7.7                                                              |
| IMC/ICU<br>(n=59)                       | CV 27.1, P 15.3, C/I 11.9, AH 27.1, DM 10.2, O 5.1, M 16.9, GE 10.2, OR 6.8,<br>N 5.1, R 6.8, S 1.7, G 1.7, OPH 1.7           |

CV = cardiovascular disease, L = lung disease, C/I = Cancer or immunosuppression, AH = arterial hypertension, DM = diabetes mellitus, O = obese, M = metabolic disease, GE = gastroenterologic disease, OR = orthopedic disease, N = neurologic disease, R = renal disease, S = skin disorder, ET = ear/throat disease, G = gynecologic disease, OPH = ophthalmologic disease, PSY = psychological disorder
